# Supplementary figures and images for: Precise regulation of the guidance receptor DMA-1 by KPC-1/Furin instructs dendritic branching decisions
Source: eLife journal article supplement (doi:10.7554/elife.11008), 2016-03-14

Figure 1- Figure supplement 1

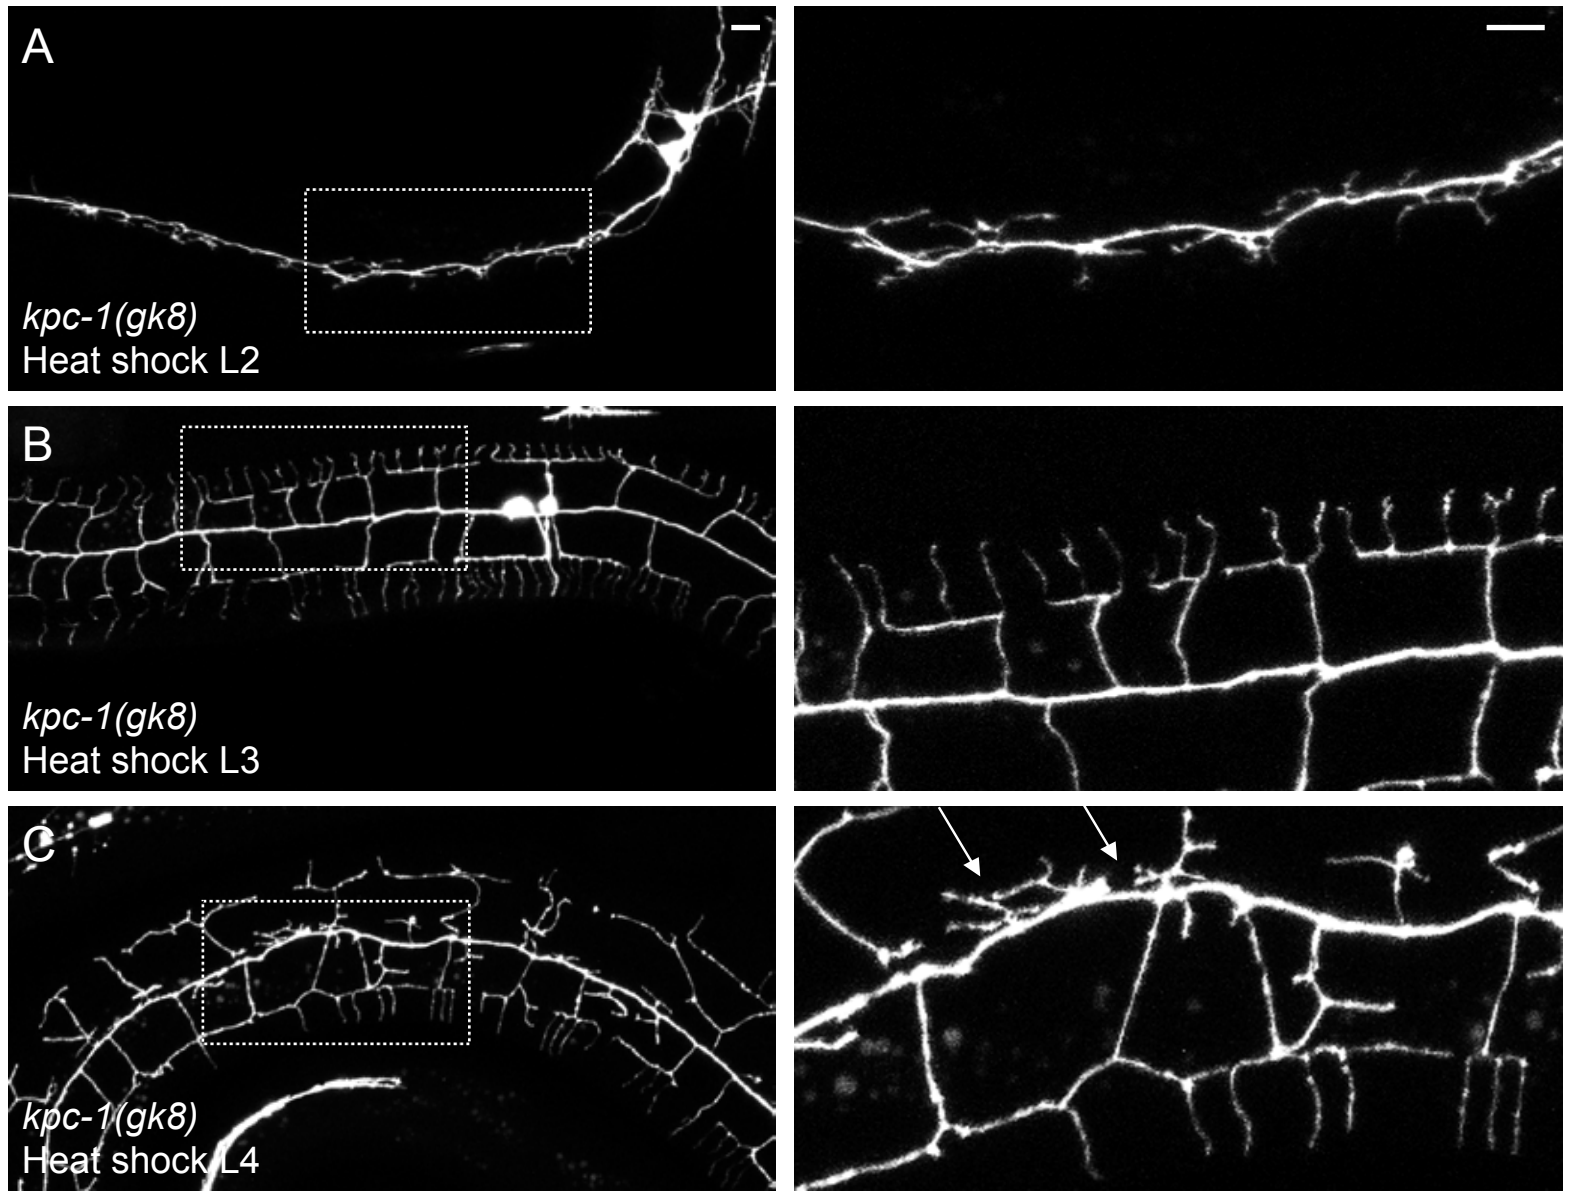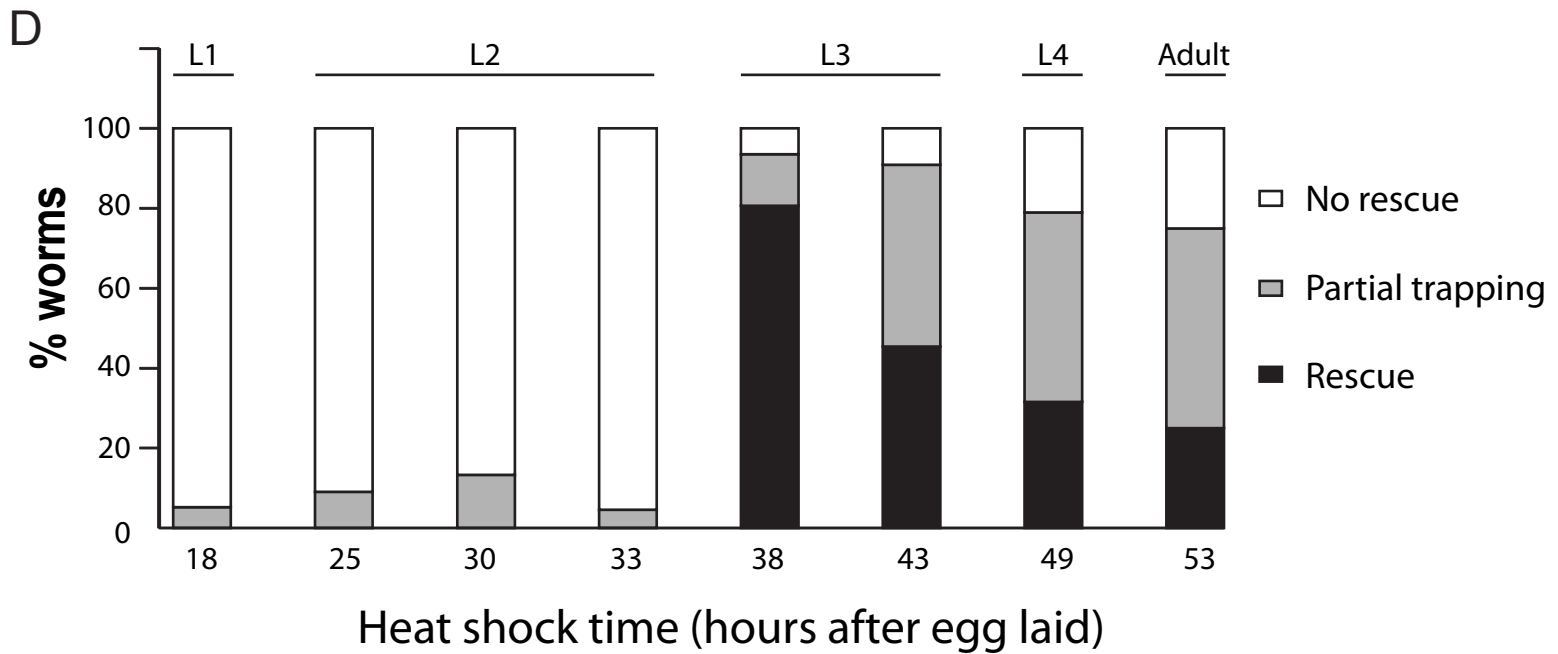

Supplement: supp [file elife_poa_e11008_Figure_1_figure_supplement_1.pdf › elife_poa_e11008_Figure_1_figure_supplement_1.pdf]

Figure 2 - Figure supplement 1

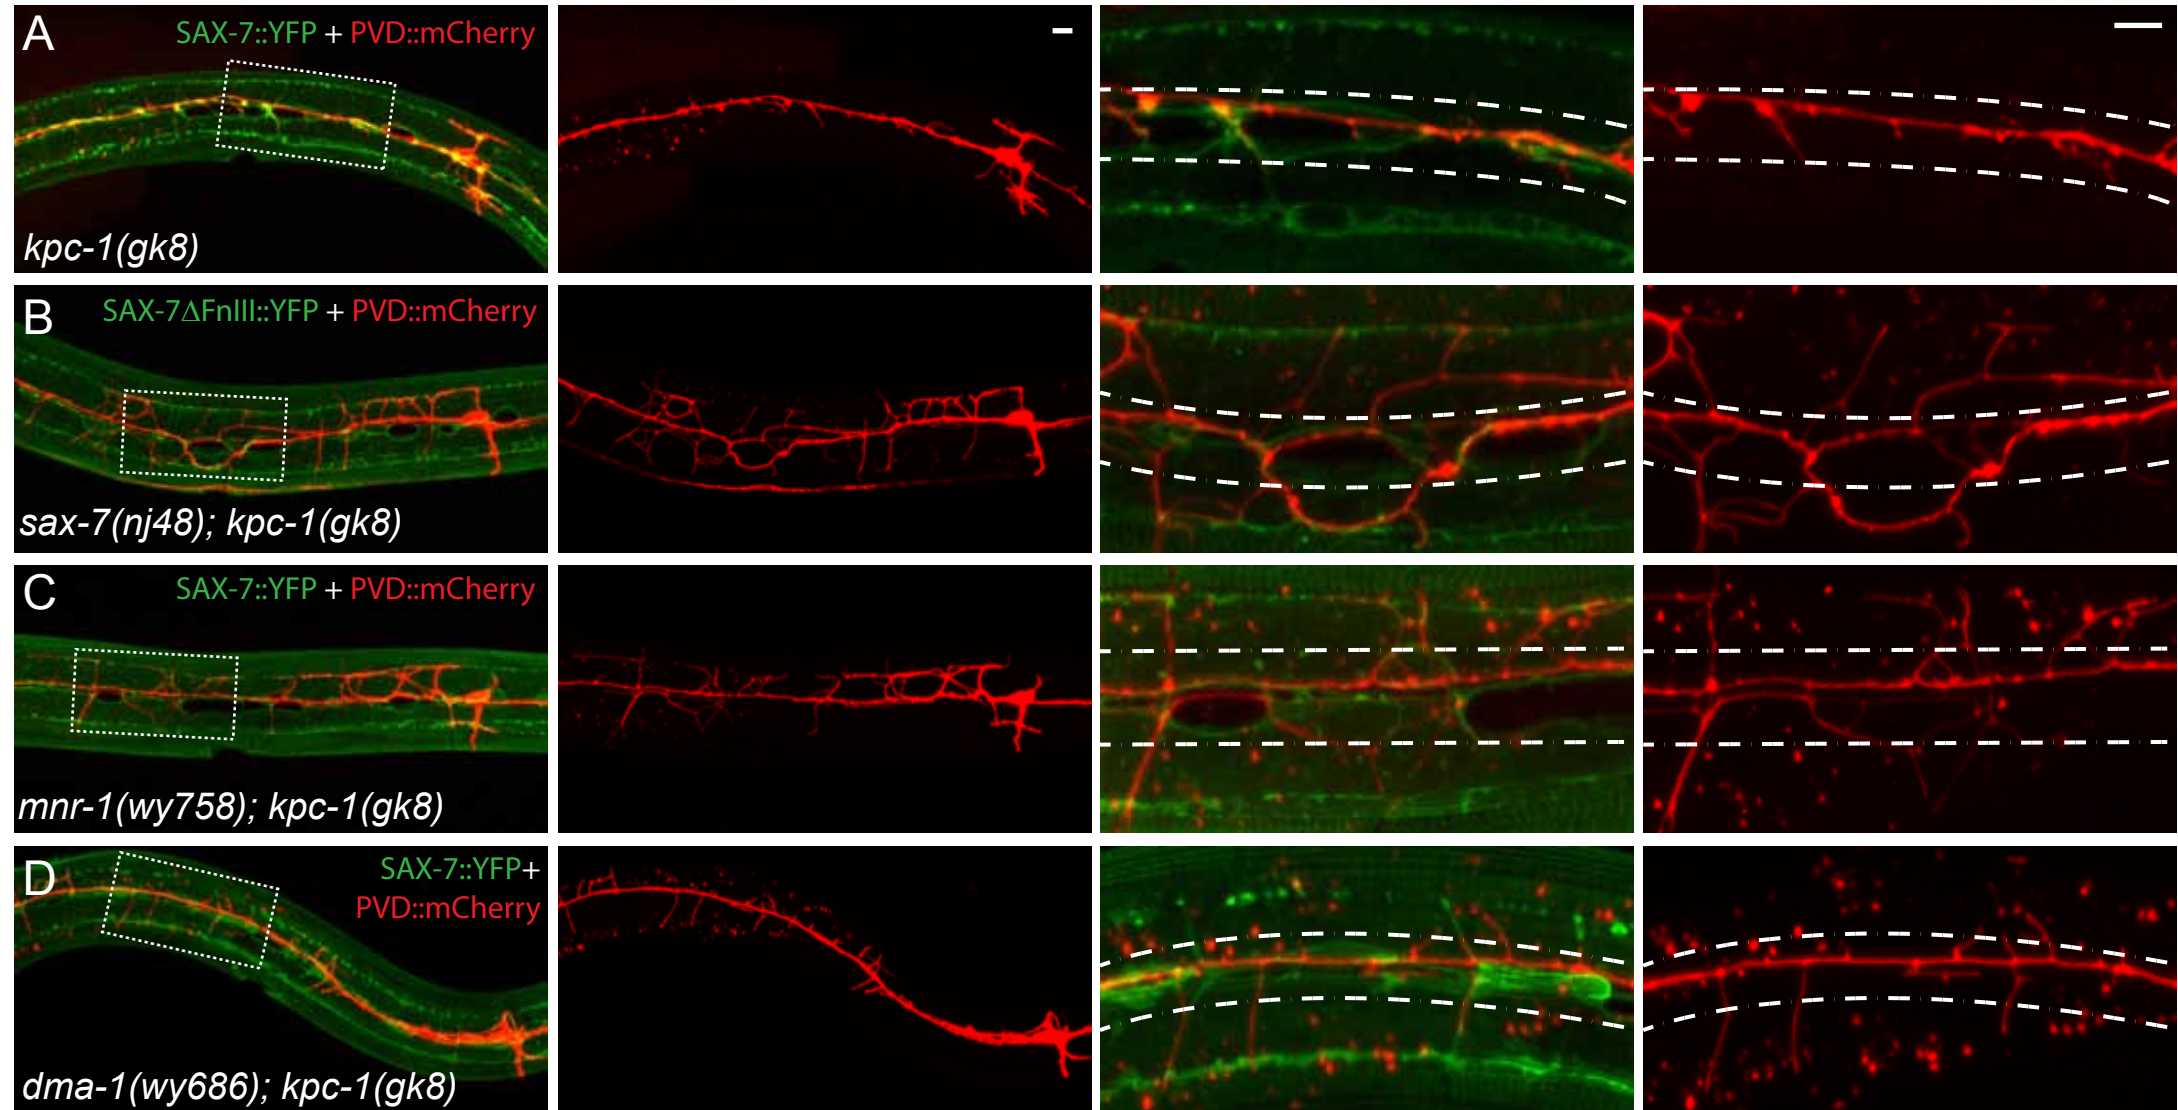

Supplement: supp [file elife_poa_e11008_Figure_2_figure_supplement_1.pdf › elife_poa_e11008_Figure_2_figure_supplement_1.pdf]

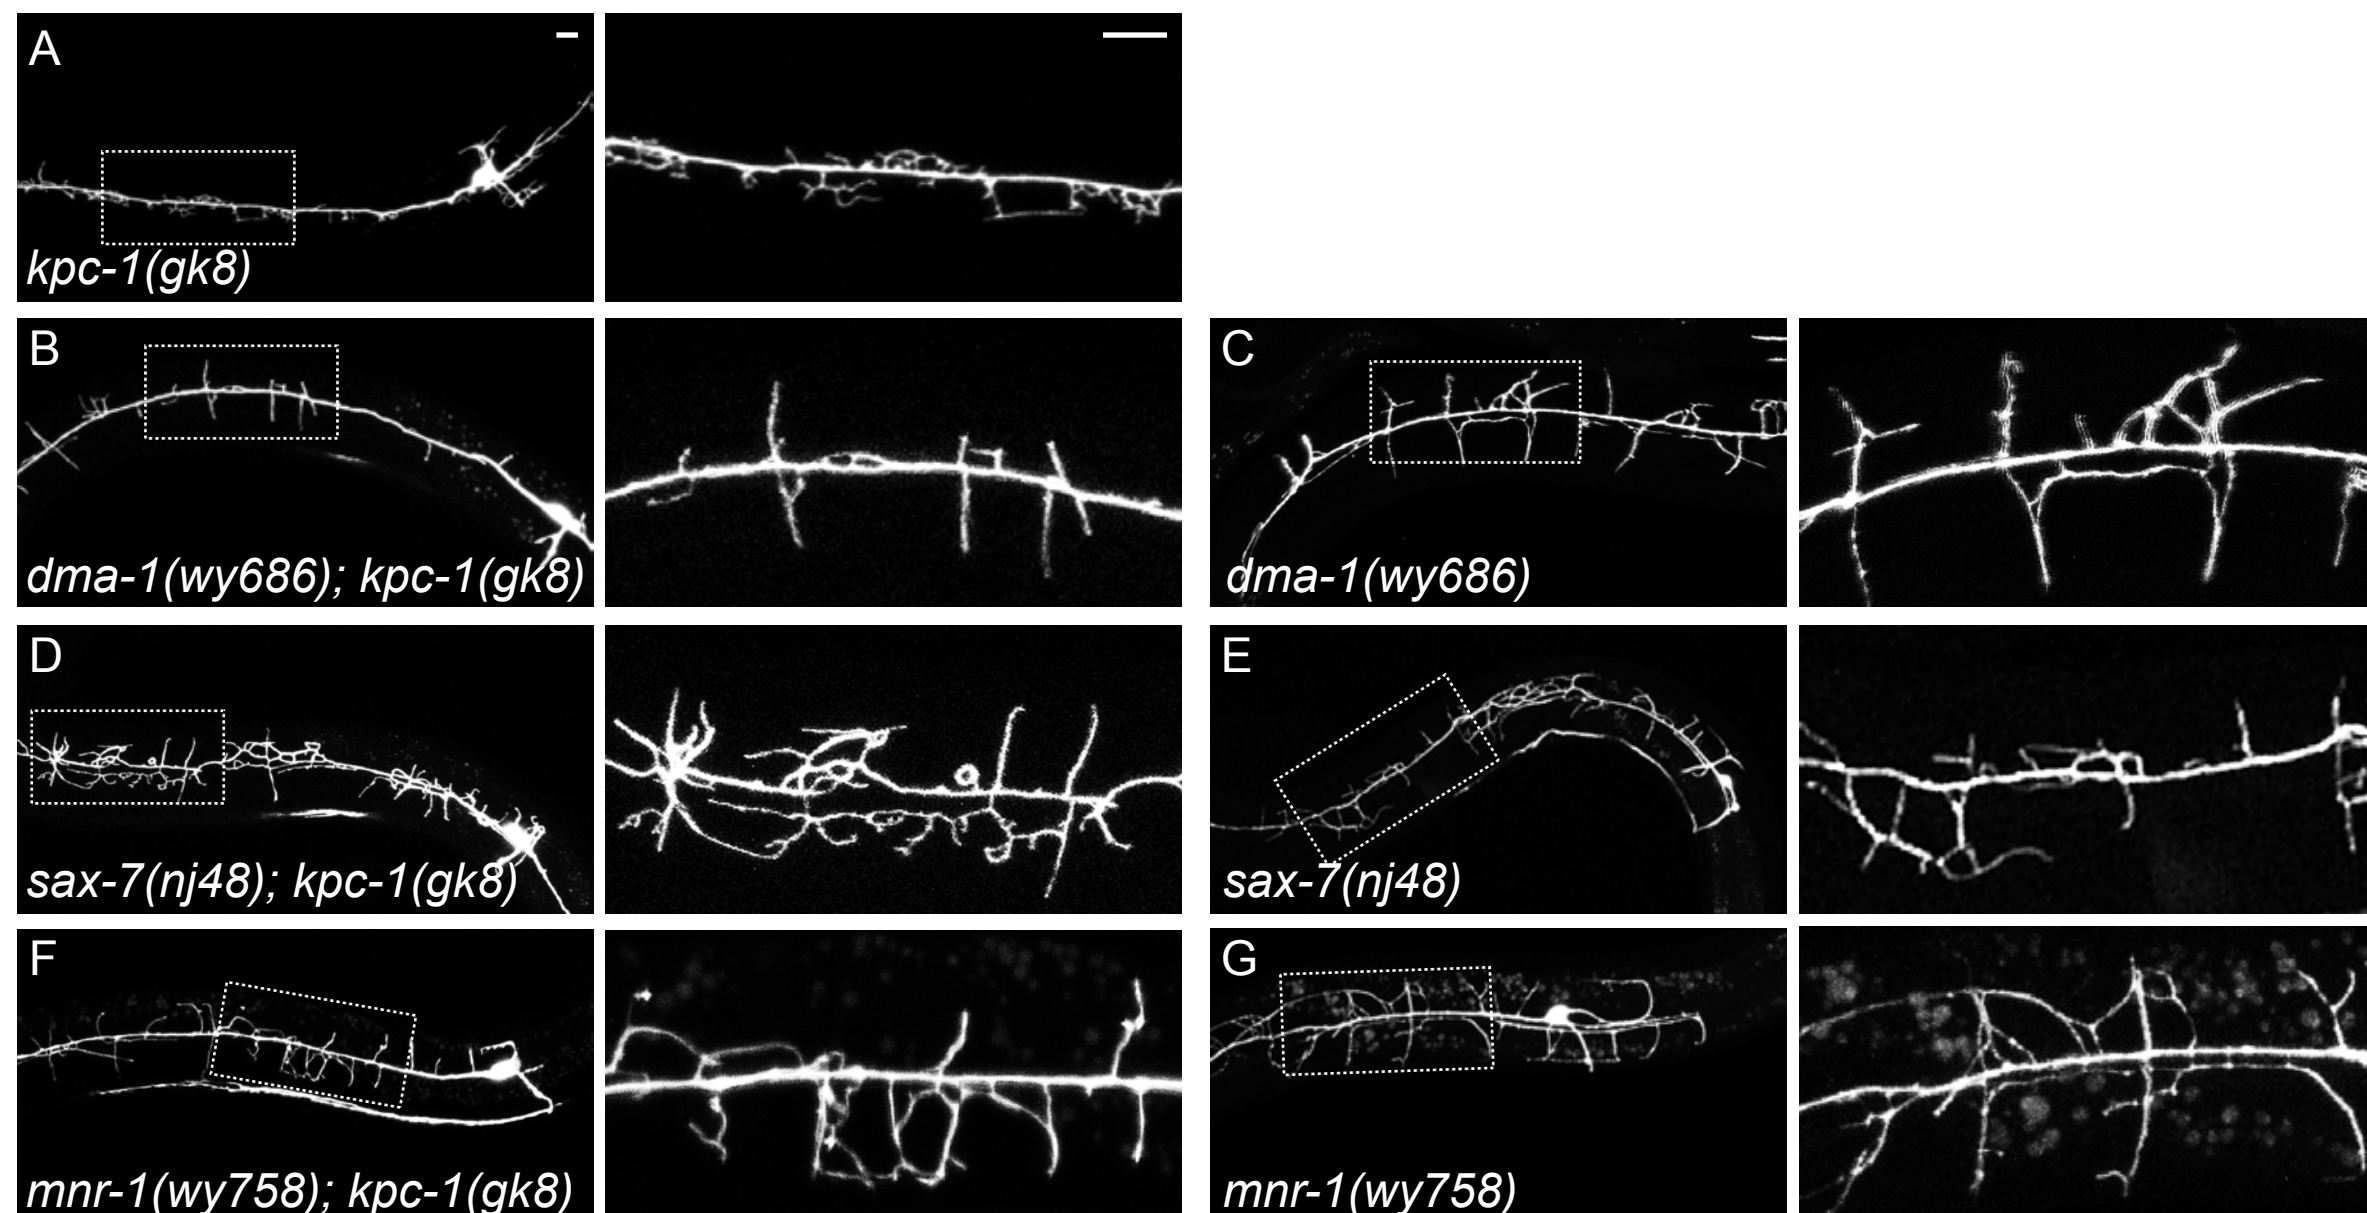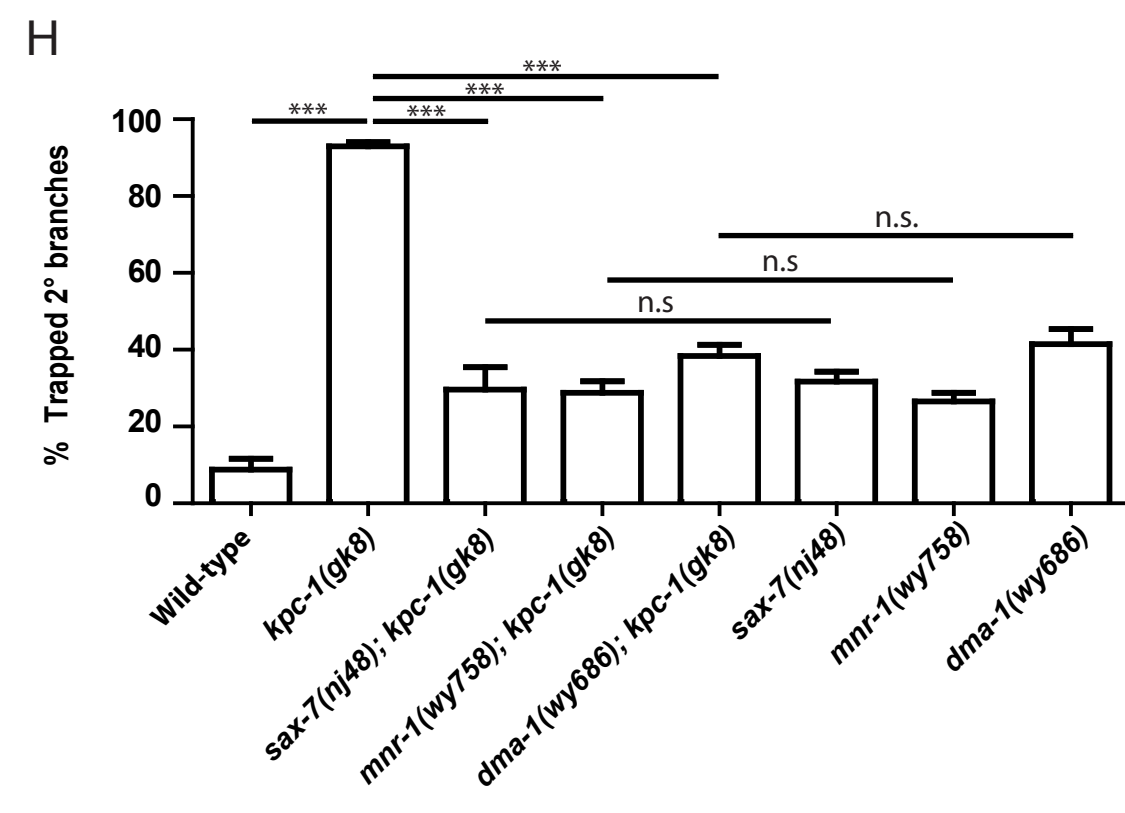

Supplement: supp [file elife_poa_e11008_Figure_2_figure_supplement_2.pdf › elife_poa_e11008_Figure_2_figure_supplement_2.pdf]

Figure 2 - Figure Supplement 3

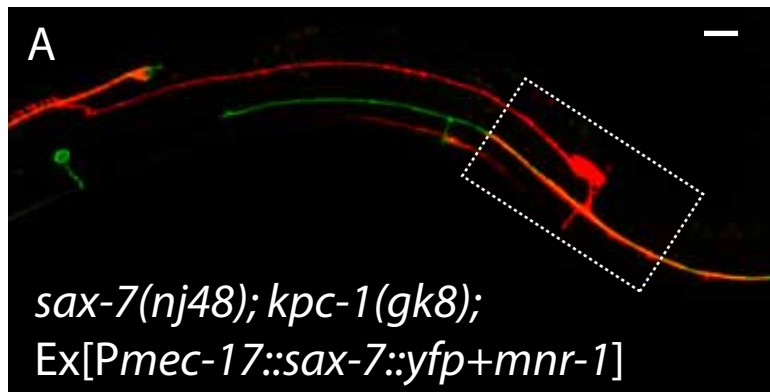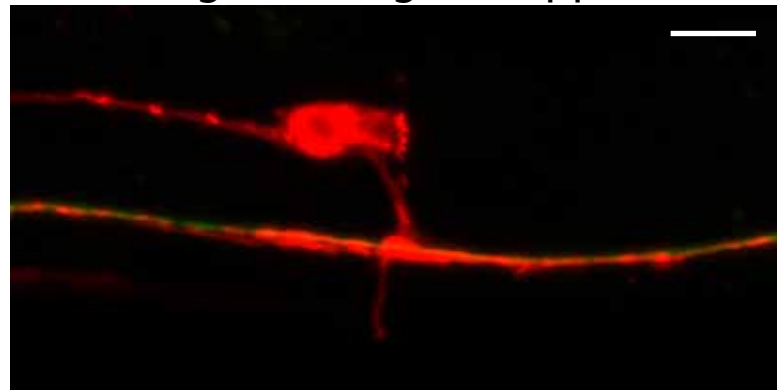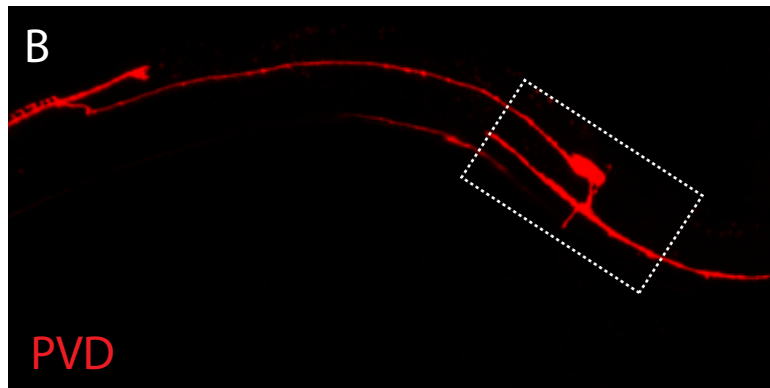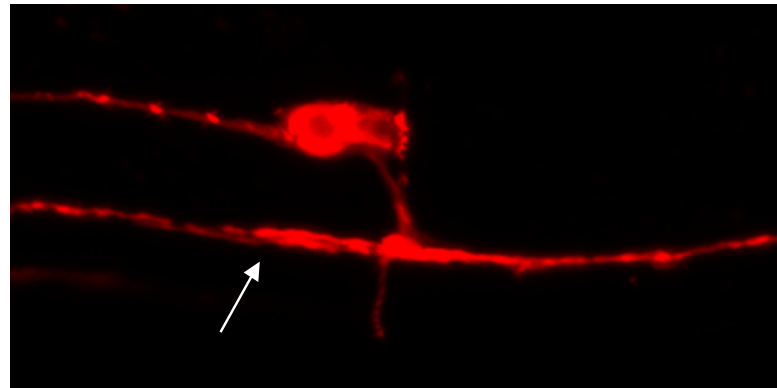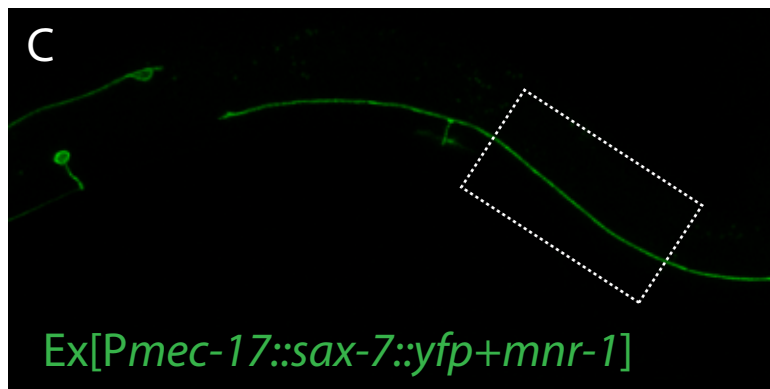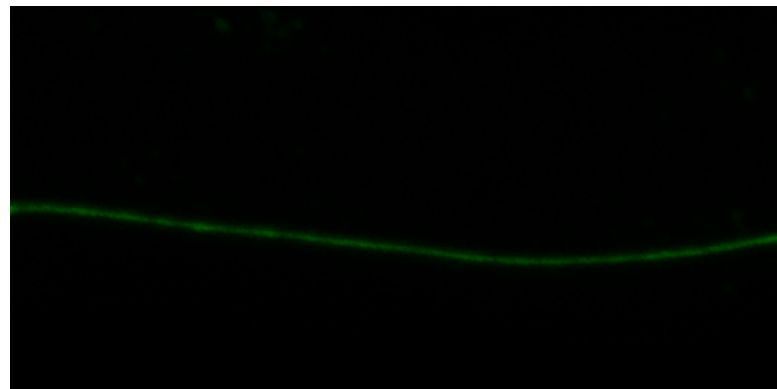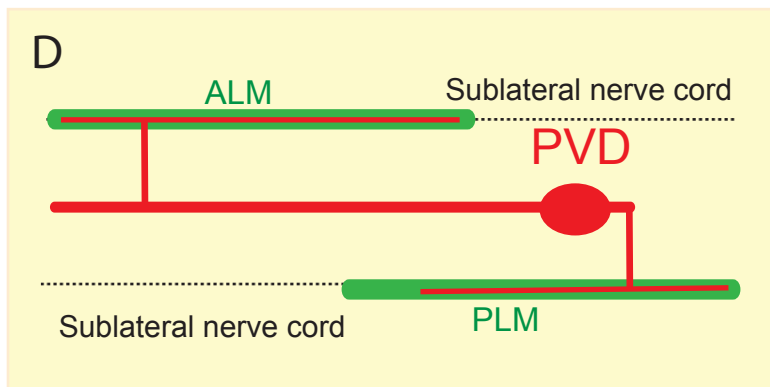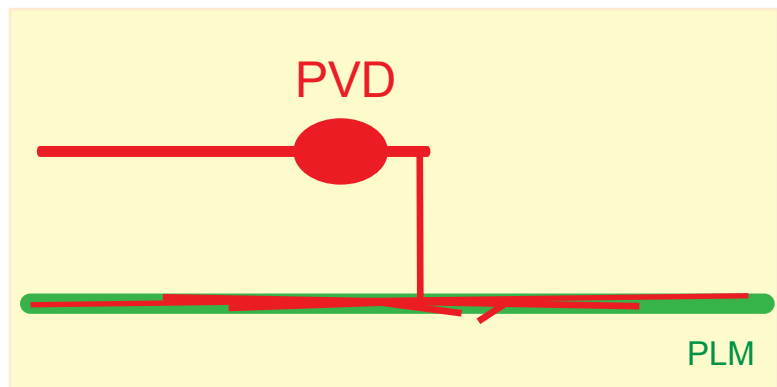

Supplement: supp [file elife_poa_e11008_Figure_2_figure_supplement_3.pdf › elife_poa_e11008_Figure_2_figure_supplement_3.pdf]

Figure 3 - Figure supplement 1

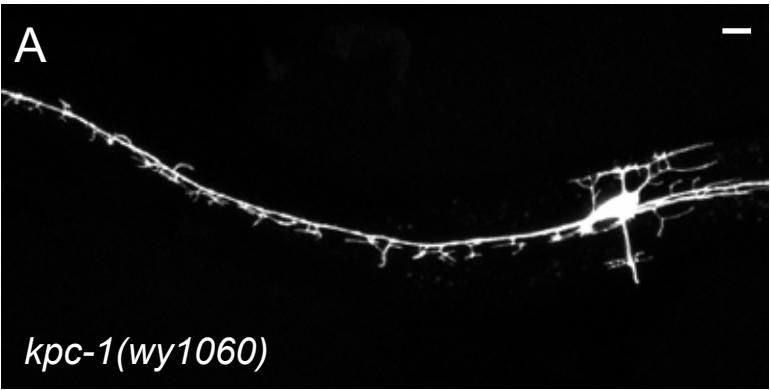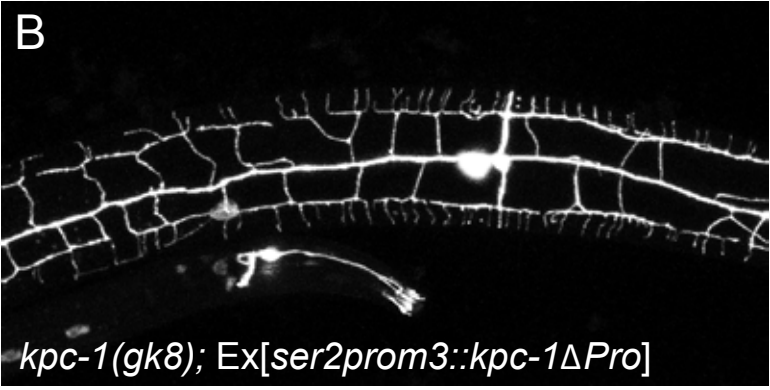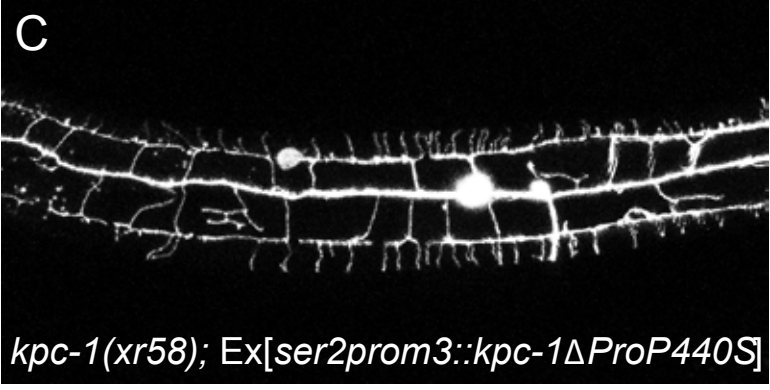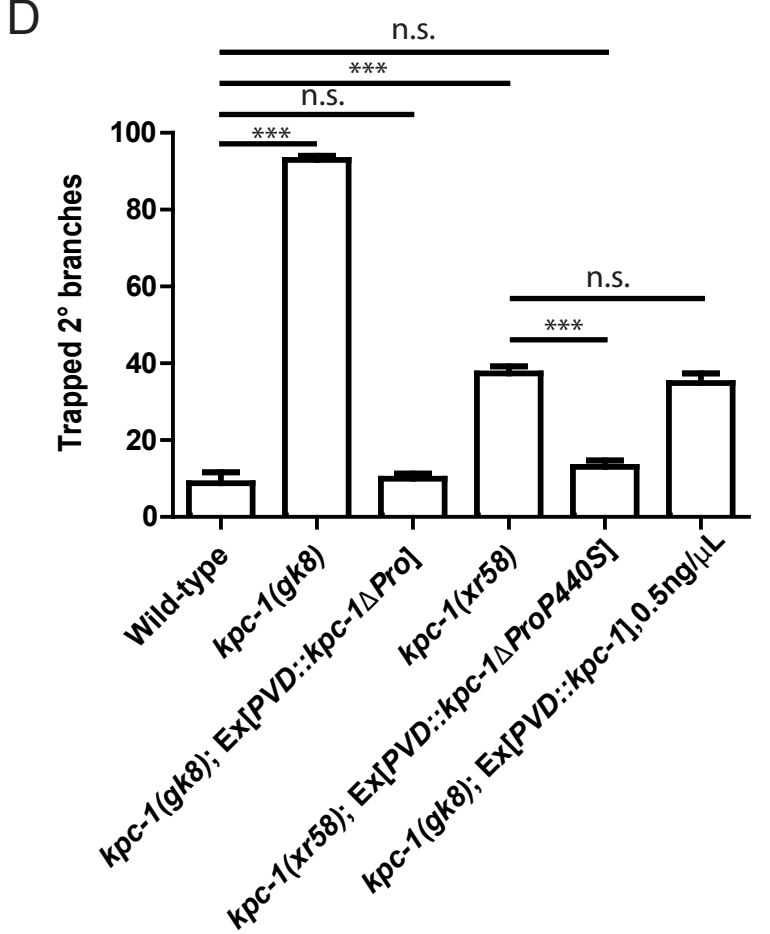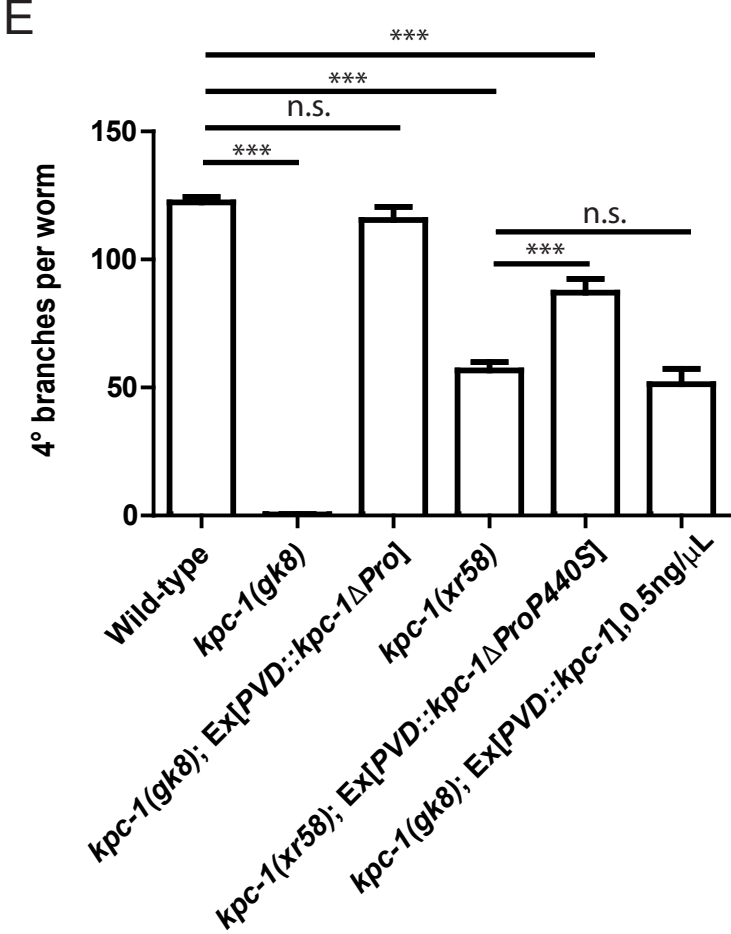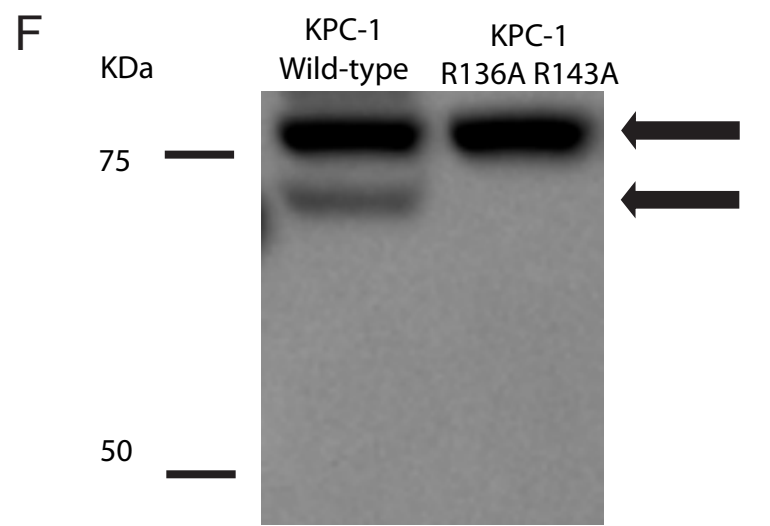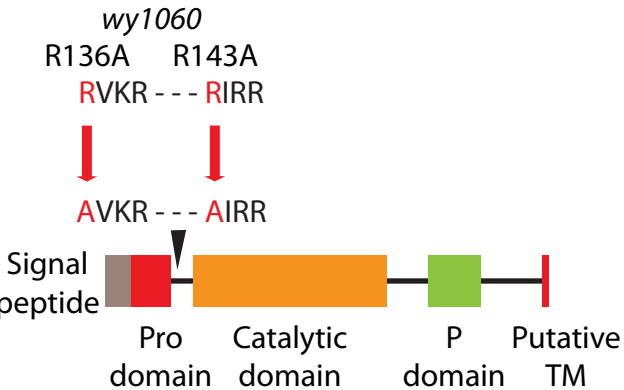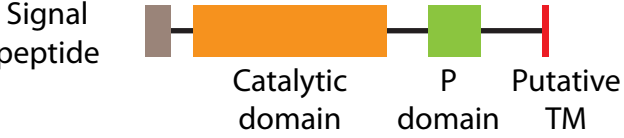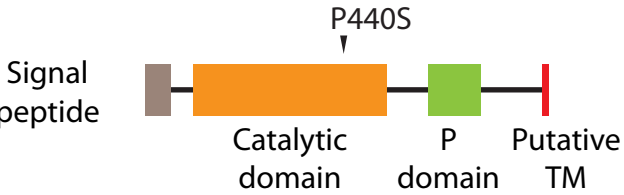

Supplement: supp [file elife_poa_e11008_Figure_3_figure_supplement_1.pdf › elife_poa_e11008_Figure_3_figure_supplement_1.pdf]

Figure 4 - Figure supplement 1

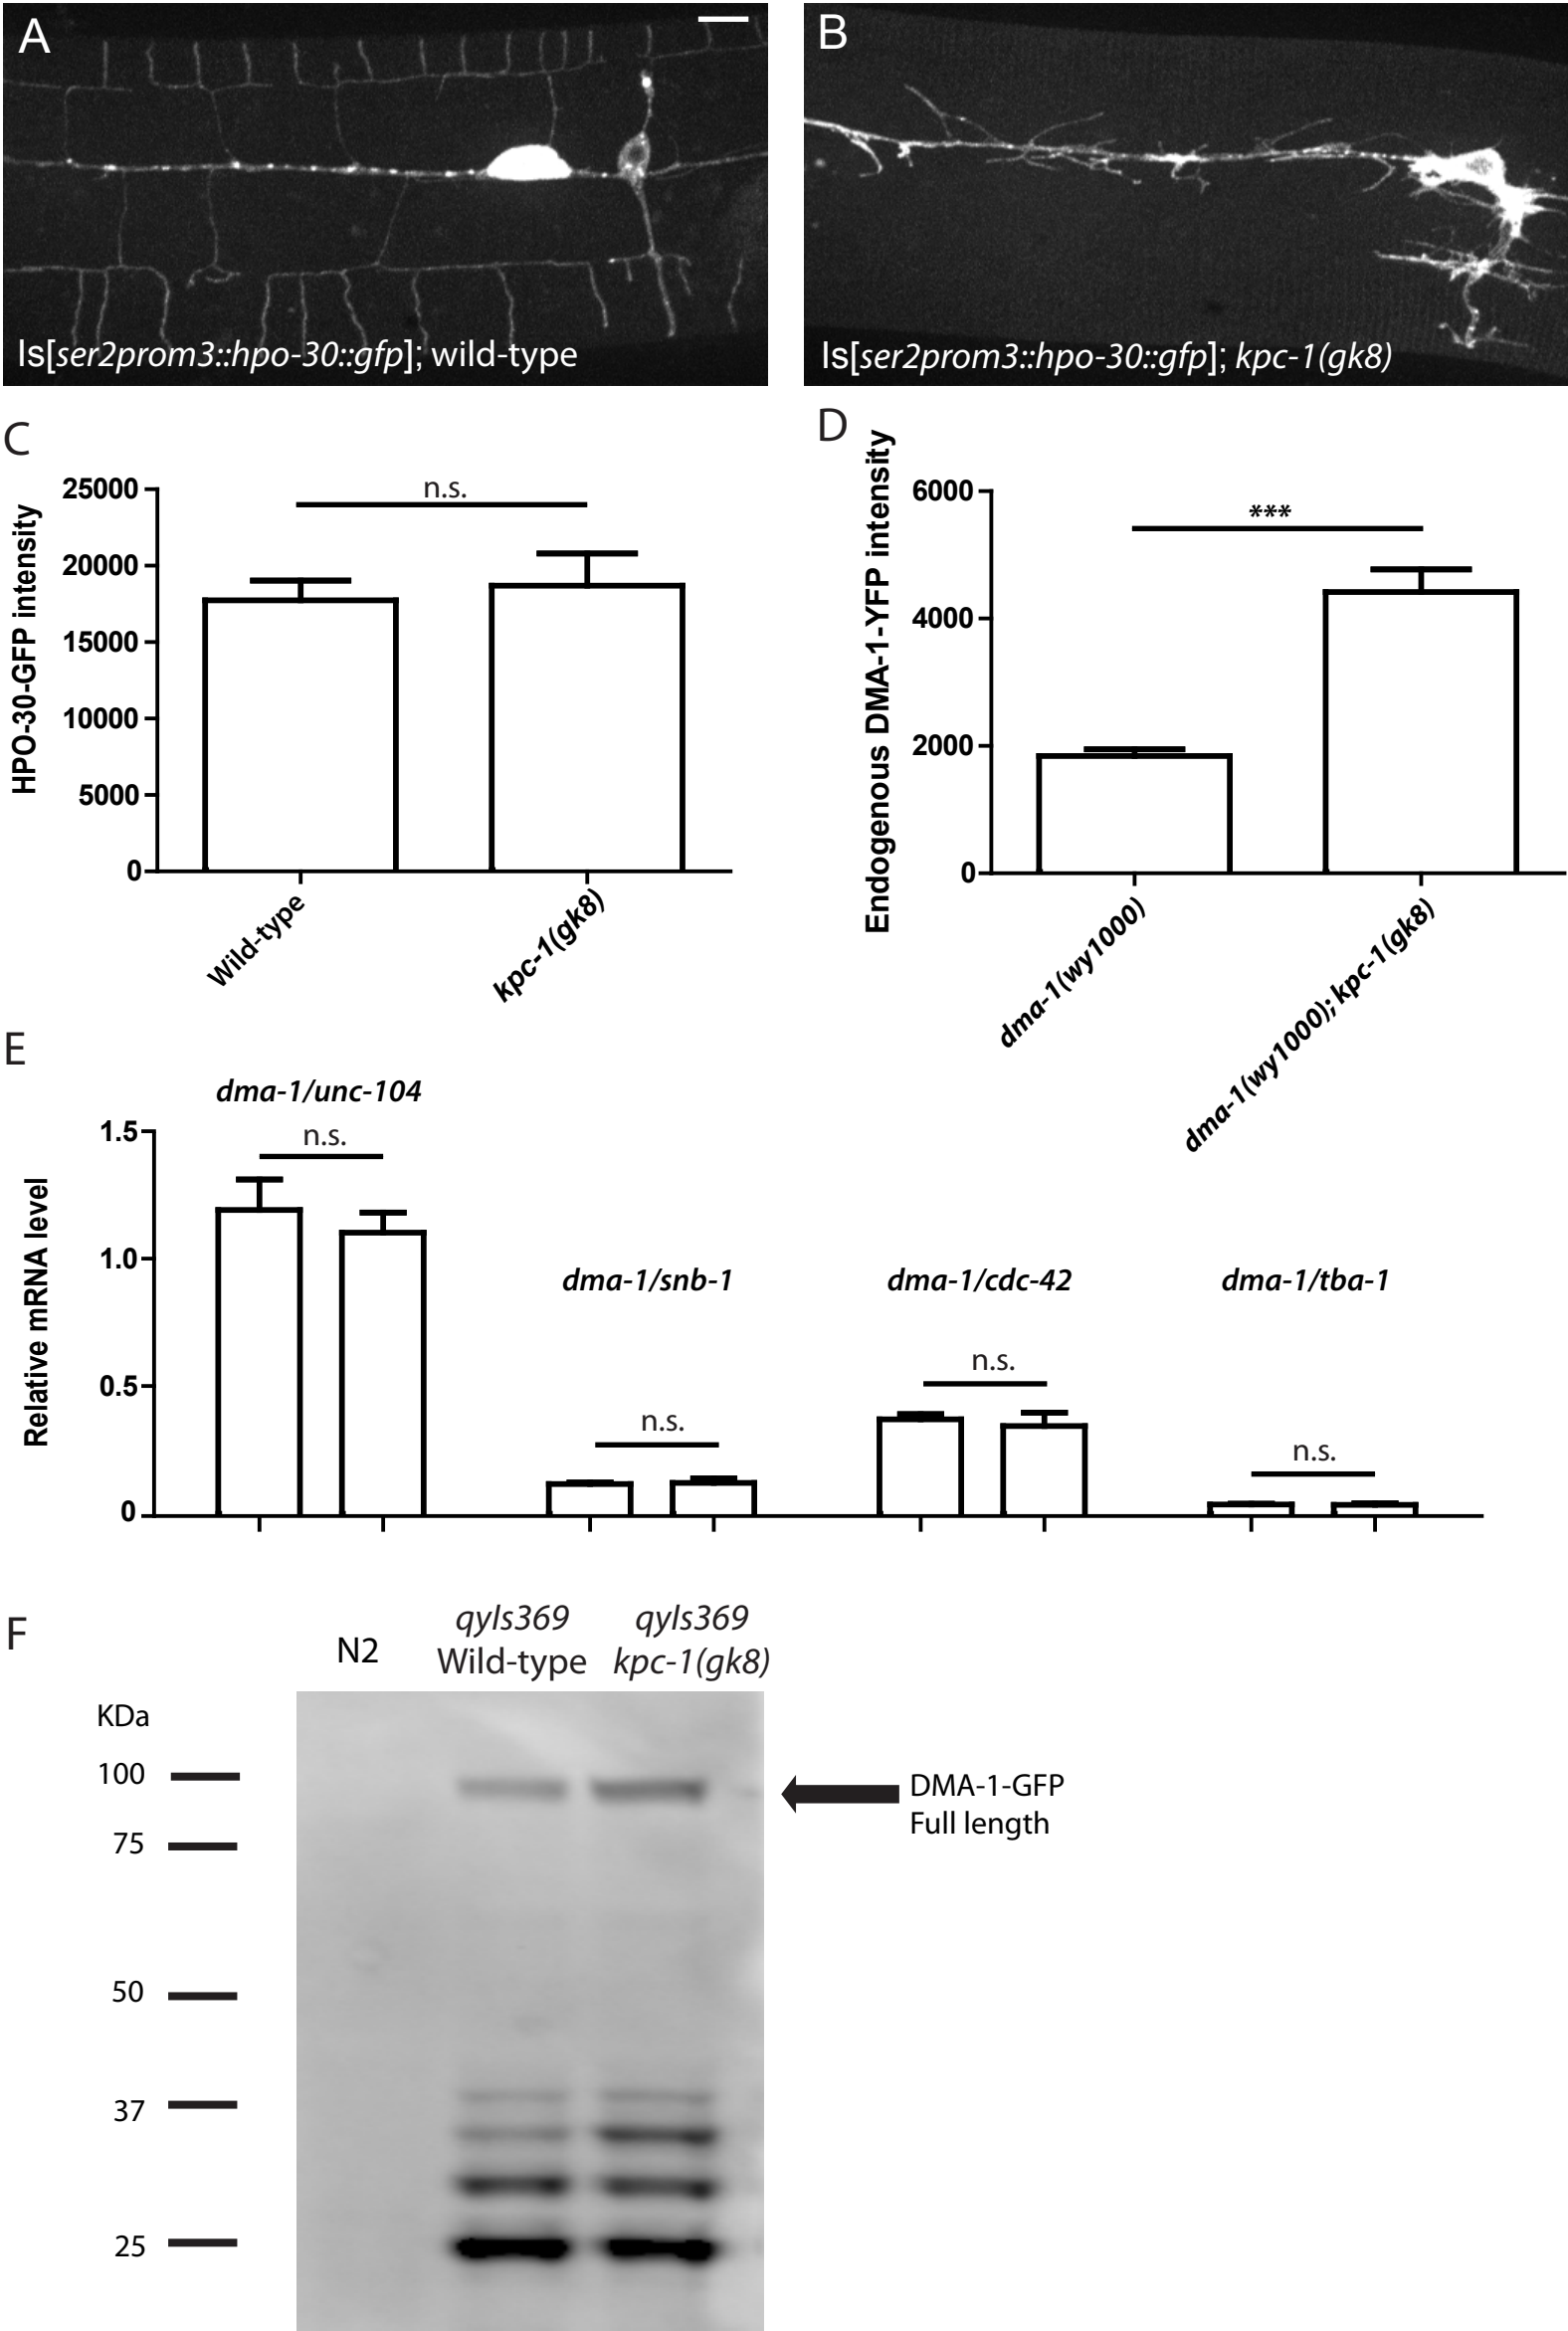

Supplement: supp [file elife_poa_e11008_Figure_4_figure_supplement_1.pdf › elife_poa_e11008_Figure_4_figure_supplement_1.pdf]

Figure 4 - Figure supplement 2

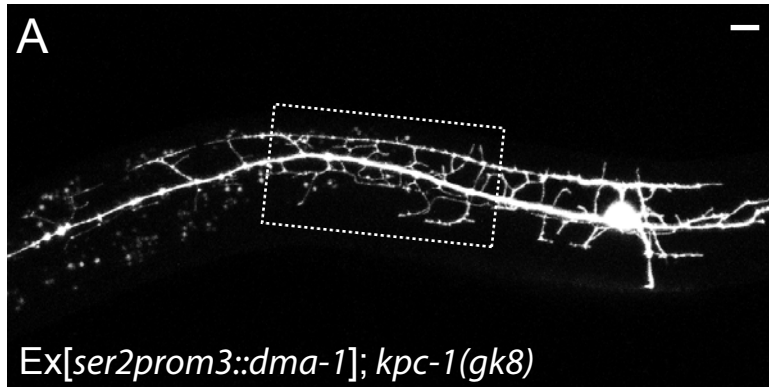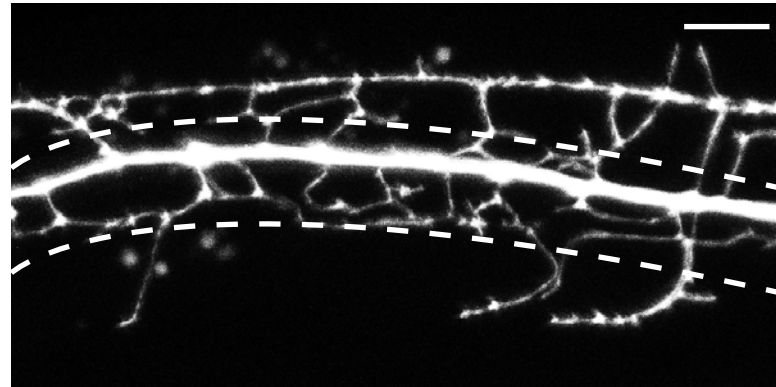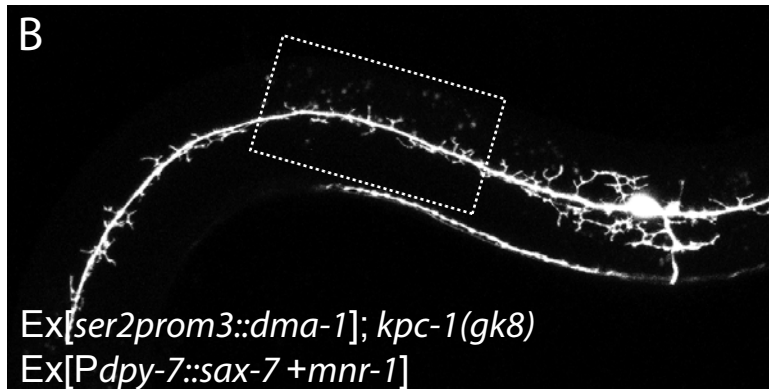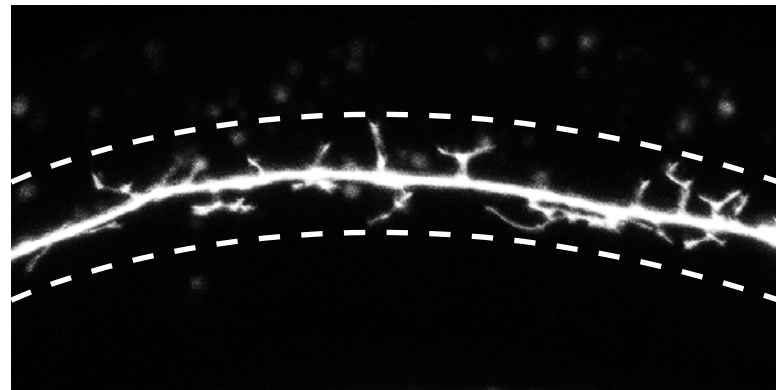

Supplement: supp [file elife_poa_e11008_Figure_4_figure_supplement_2.pdf › elife_poa_e11008_Figure_4_figure_supplement_2.pdf]

Figure 5 - Figure supplement 1

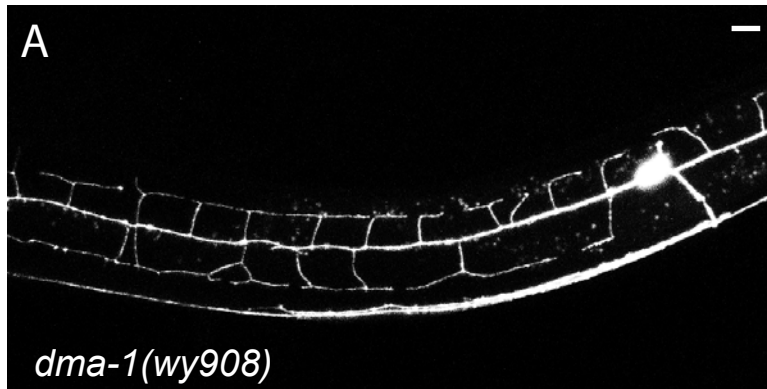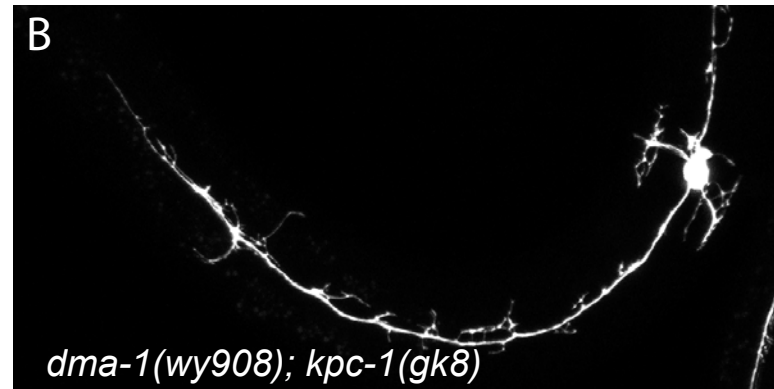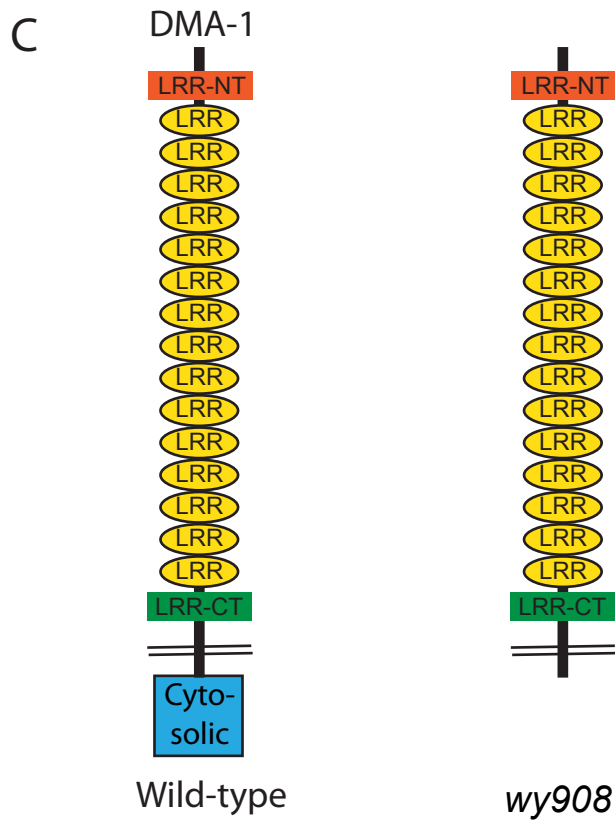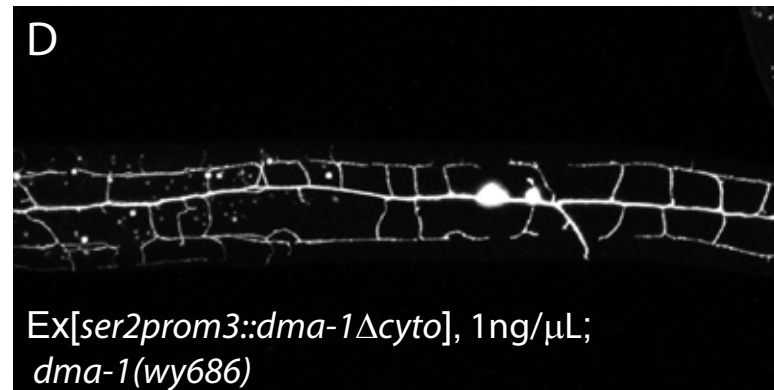

Supplement: supp [file elife_poa_e11008_Figure_5_figure_supplement_1.pdf › elife_poa_e11008_Figure_5_figure_supplement_1.pdf]

A

DMA-1-RFP  
+  
mCD8-Venus

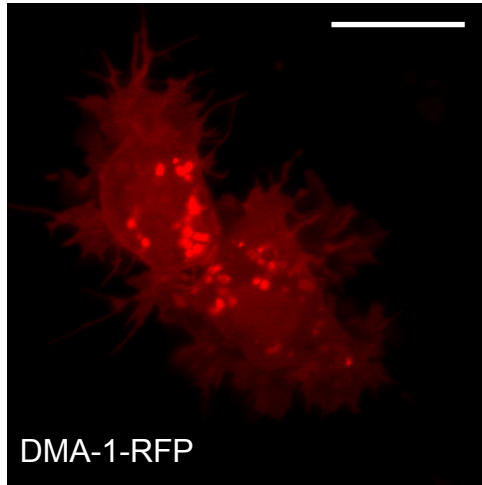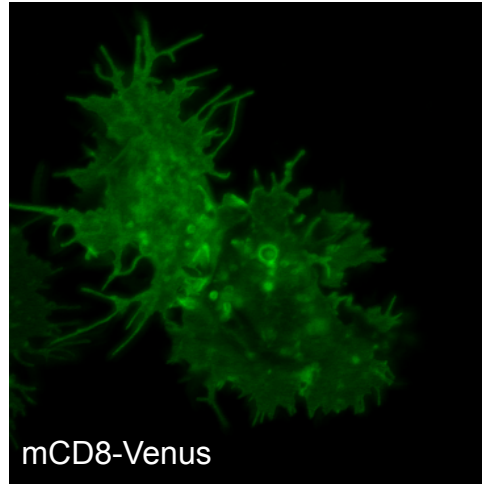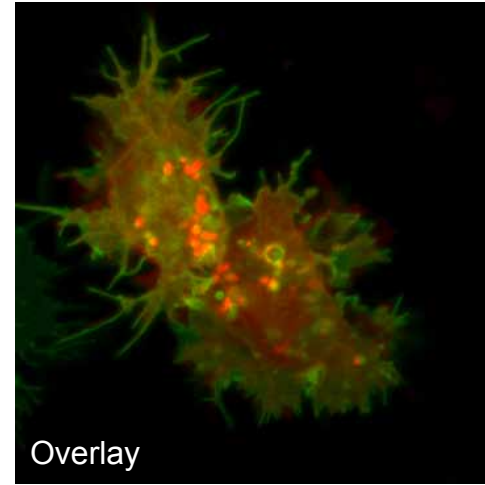

B

DMA-1-RFP  
+  
mCD8-Venus  
+  
KPC-1-CFP

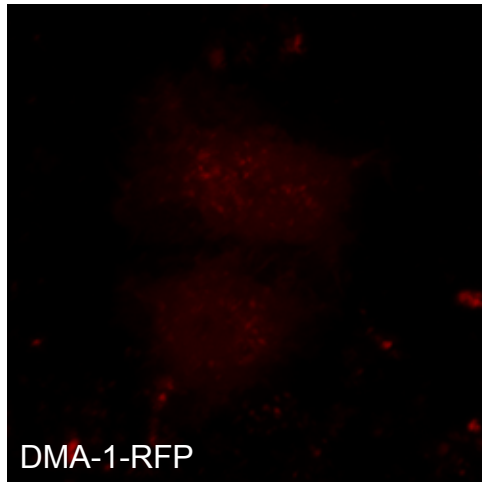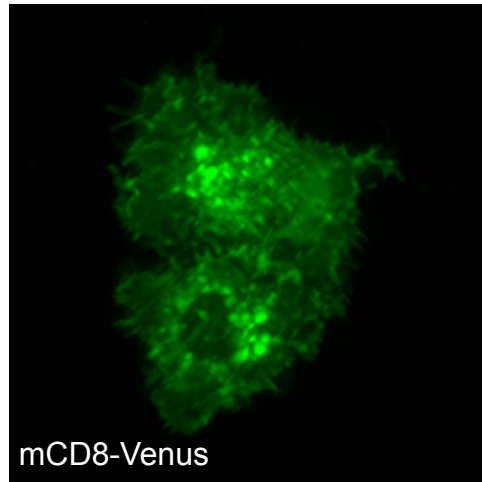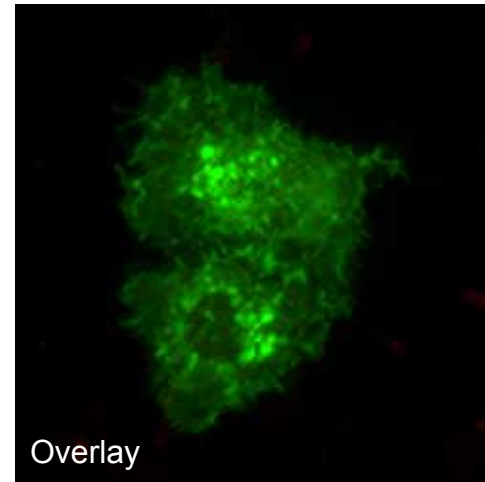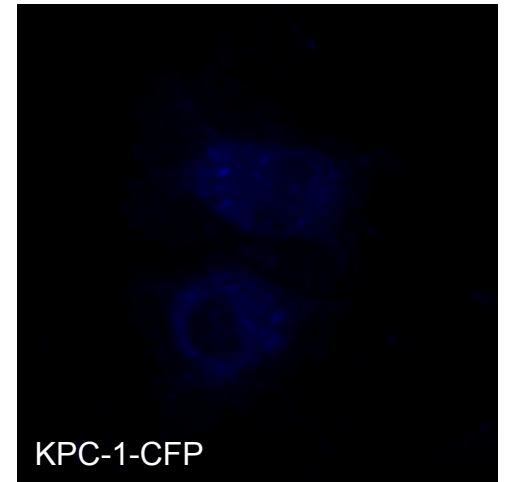

Supplement: supp [file elife_poa_e11008_Figure_6_figure_supplement_1.pdf › elife_poa_e11008_Figure_6_figure_supplement_1.pdf]
